# Supplementary material
Source: publisher site journal article supplement (https://www.dovepress.com/article/318331)
Supplement: Supplementary file 1 [file get_supplementary_file.php]

**Figure S1. Caerulein-induced CP mouse model.** (A) Caerulein injection schedule. (B) Pancreas H&E and Picrosirius red staining of healthy c57bl/6j and caerulein-induced CP mice. Acinar cell atrophy (black arrows) and fibroblast/immune cell infiltrations (red arrows) are observed in CP mice. Brightfield 50x.

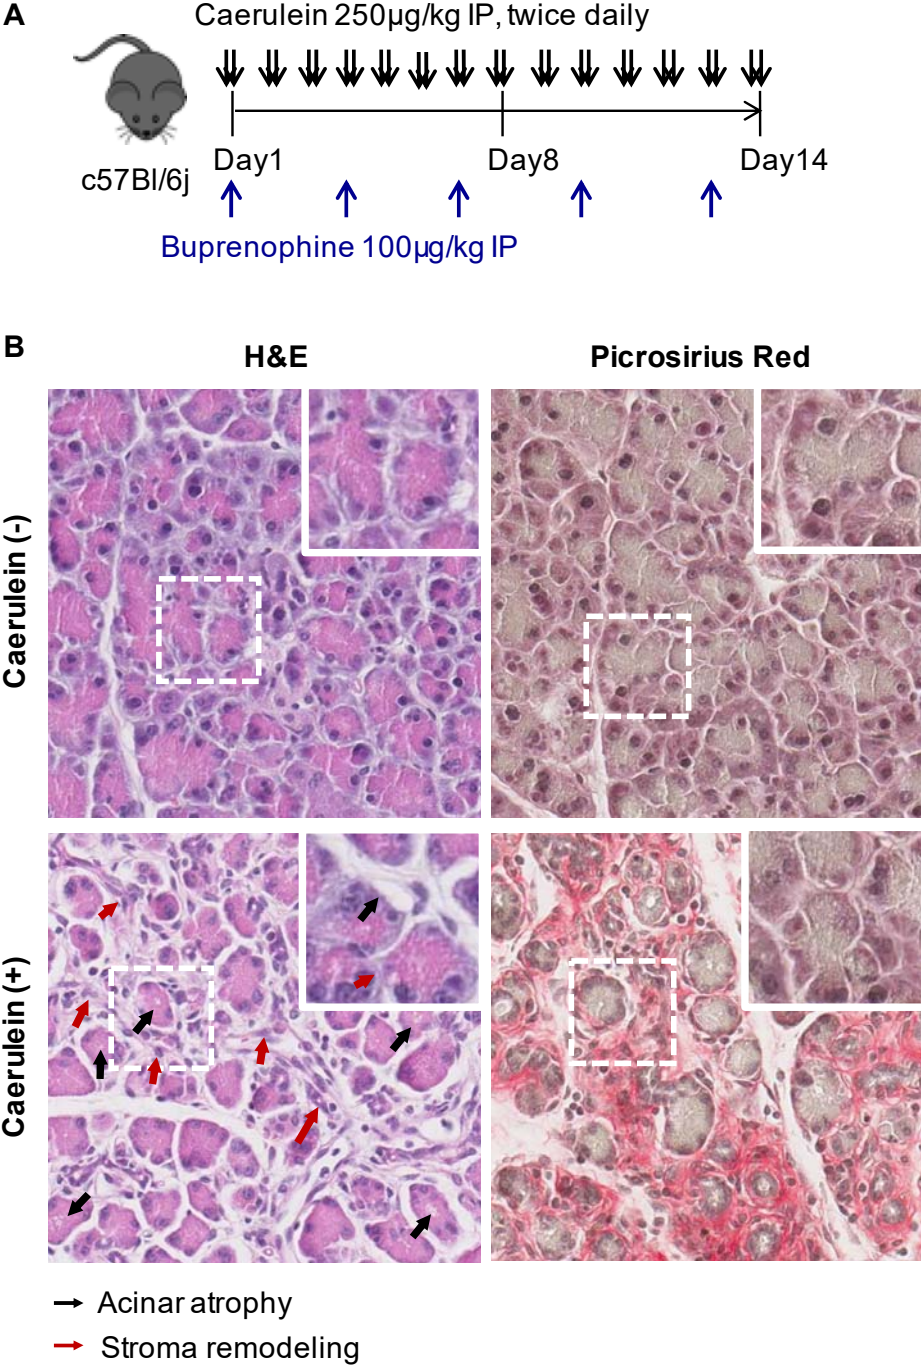

**Figure S2. Candidate clones grouping and fluorescent labeling.** (A) Candidate clones grouping based on sequence similarity by GibbsCluster Server 2.0. for group validation. (B) Table of fluorescent labeling of candidate phage clones. (C) Equations to calculate normalized percent injected dose (%ID) per tissue weight and VT680-to-VT750 ratio.

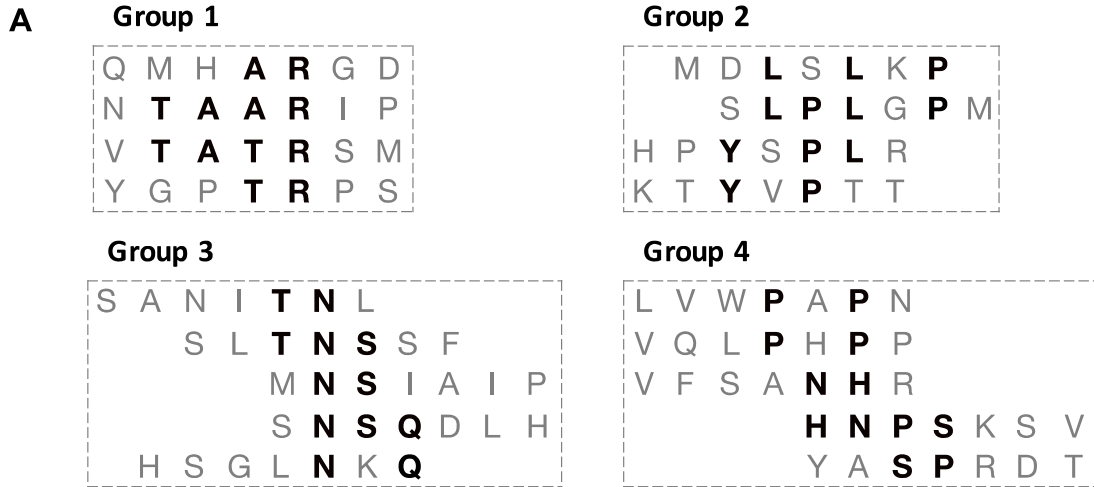

**B**

| Group | # Dye per phage (CP; Healthy)  | Phage injected (pfu) equil. to 1nmol dye (CP; Healthy)                                         |
|-------|--------------------------------|------------------------------------------------------------------------------------------------|
| 1     | 182.44 ± 2925<br>191.36 ± 3708 | 3.08×10 <sup>11</sup> ± 4.17×10 <sup>10</sup><br>2.93×10 <sup>11</sup> ± 5.44×10 <sup>10</sup> |
| 2     | 233.43 ± 1923<br>215.99 ± 2035 | 4.32×10 <sup>11</sup> ± 1.42×10 <sup>11</sup><br>4.82×10 <sup>11</sup> ± 1.24×10 <sup>11</sup> |
| 3     | 234.32 ± 3121<br>212.04 ± 3568 | 3.14×10 <sup>11</sup> ± 7.68×10 <sup>10</sup><br>4.02×10 <sup>11</sup> ± 5.10×10 <sup>10</sup> |
| 4     | 240.93 ± 3701<br>203.53 ± 3550 | 3.36×10 <sup>11</sup> ± 8.78×10 <sup>10</sup><br>4.35×10 <sup>11</sup> ± 6.76×10 <sup>10</sup> |
| WT    | 321.09 ± 4503<br>376.06 ± 2037 | 5.18×10 <sup>11</sup> ± 6.69×10 <sup>10</sup><br>3.70×10 <sup>11</sup> ± 2.13×10 <sup>10</sup> |

**C**

$$\begin{aligned}
 \%ID/g &= \frac{dye\ in\ panc}{phage\ injected \times dye/phage} \\
 &\times \frac{1}{mass\ panc} \times 100\%
 \end{aligned}$$

$$VT680\text{-to-}VT750\ ratio = \frac{\%ID/g\ VT680}{\%ID/g\ VT750}$$

**Figure S3. The size distribution of peptide modified liposomes detected by NanoSight.** (A) NP liposomes. (B) MDLSLKP liposomes. (C) MNSIAIP liposomes.

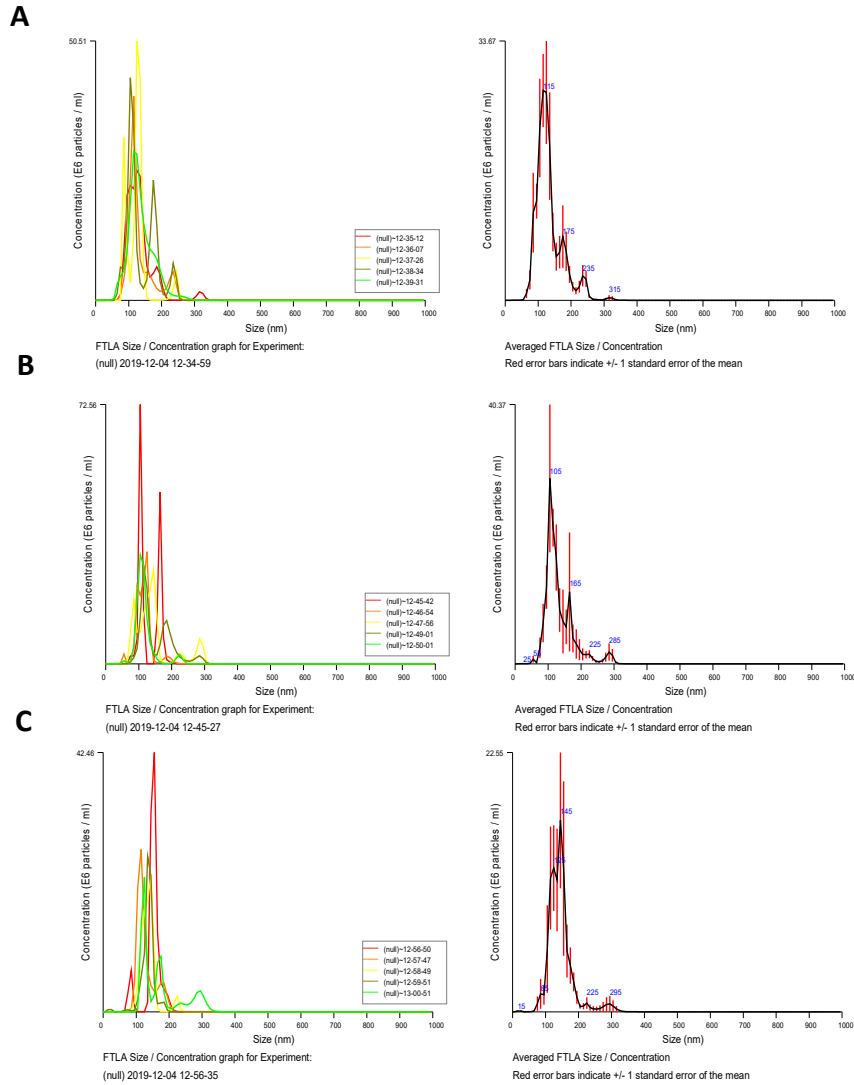

**Figure S4. Apigenin loading in peptide-modified liposomes.** (A) Chemical structure and (B) physicochemical properties of apigenin reported on PubChem. (C) A characteristic table shows the properties of apigenin-loaded liposomes. (D) The release profile of apigenin in PBS at 4C, pH7.4, from liposomes. N=3. (E) In vitro release study in 50% FBS at 37C. N =3.

**A**

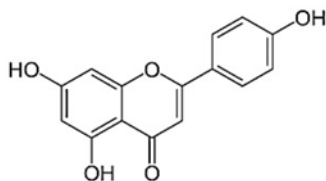

**B**

| Properties       | Apigenin, C <sub>15</sub> H <sub>10</sub> O <sub>5</sub> |
|------------------|----------------------------------------------------------|
| Molecular weight | 270.24 g/mol                                             |
| Water Solubility | 0.183 g/mL                                               |
| Charge (pH 7.4)  | 0                                                        |
| pKa              | pKa <sub>1</sub> = 7.12; pKa <sub>2</sub> = 8.10         |
| Log P            | 1.7                                                      |

**C**

|                                   | No peptide liposomes | ECM liposomes |
|-----------------------------------|----------------------|---------------|
| Size (nm)                         | 93.1 ± 3.6           | 94.3 ± 1.4    |
| Batch concentration (particle/mL) | 1.09E+14             | 1.52E+14      |
| Drug per liposome                 | 33930                | 28501         |

**D**

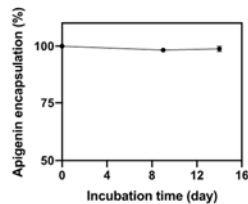

**E**

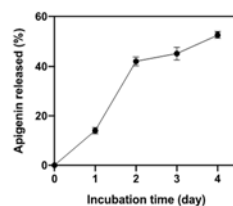

**Figure S5. Targeted liposomal delivery of apigenin reduces hepatotoxicity.** (A) Chemistry test results generated from serum samples collected from vehicle, free drug-, Api-Naked Lip- and Api-ECM Lip-treated CP mice revealing a statically significant reduction of toxic effects of the apigenin-based treatment to the mice livers ( $p$ -value = 0.0196). No significant toxic effects induced to mice kidneys is observed in all treatments. Mean  $\pm$  SEM,  $N=3$ . (B) Representative H&E staining of livers. Scale bar: 100  $\mu$ m. (C) Western blot images and the quantification of liver lysates from treated CP mice probing for SOD1. Mean  $\pm$  SEM,  $N = 5$ ,  $*p$ -value = 0.0491.

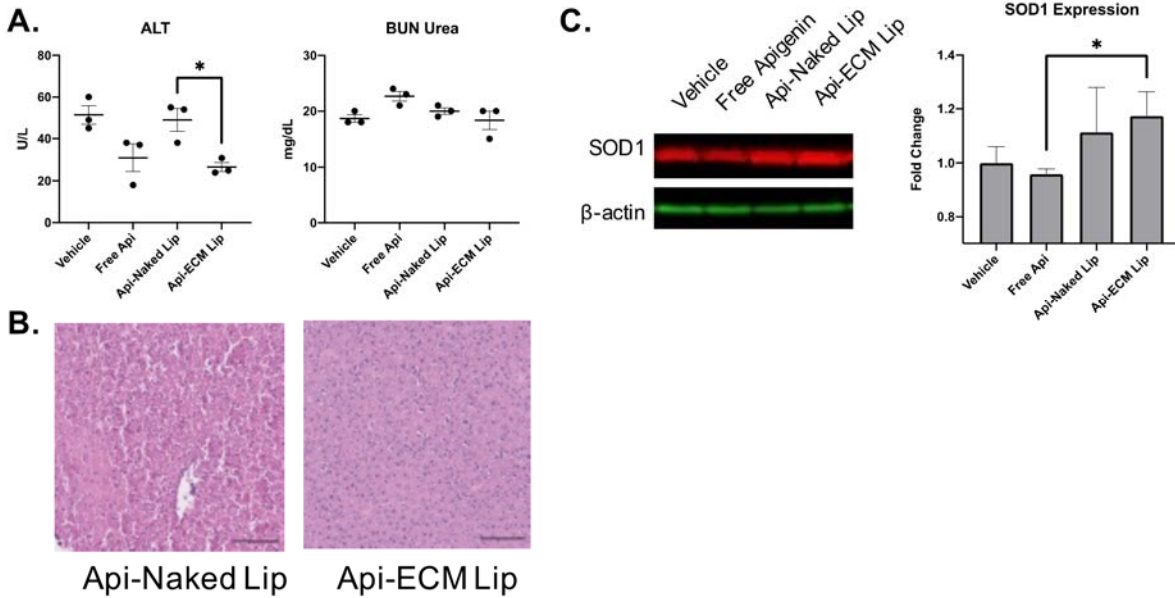

**Figure S6. Fibronectin staining in tissues other than the pancreas.** (A) Images of liver, heart, and lung stained with fibronectin harvested from mice treated with vehicle, free Apigenin, Apigenin-encapsulated control liposomes, and Apigenin-encapsulated ECM liposomes. (B) Quantification of percent fibronectin-positive area in liver, heart, and lung. N = 4 images/group. ANOVA was used: p-value = 0.699 (liver), 0.777 (heart), and 0.074 (lung).

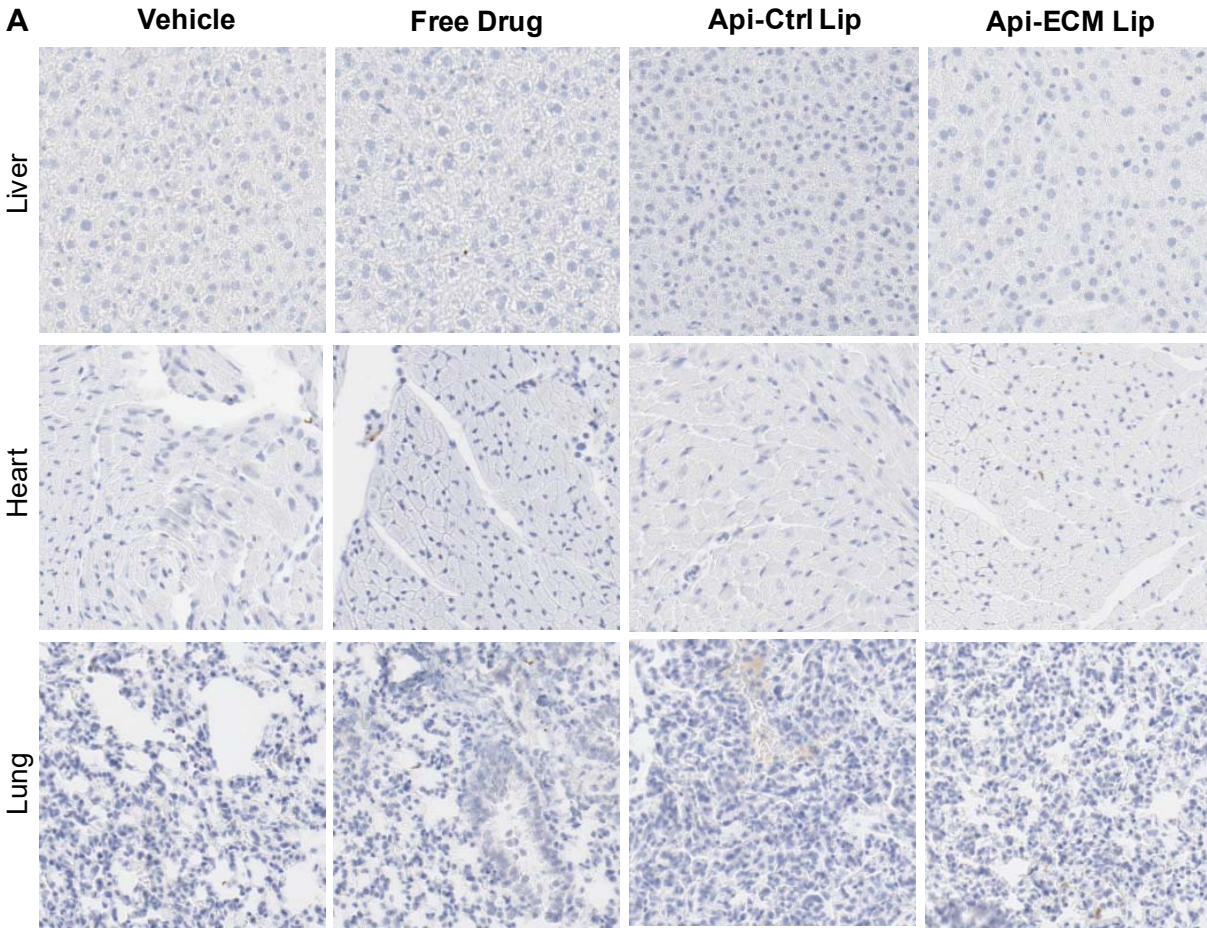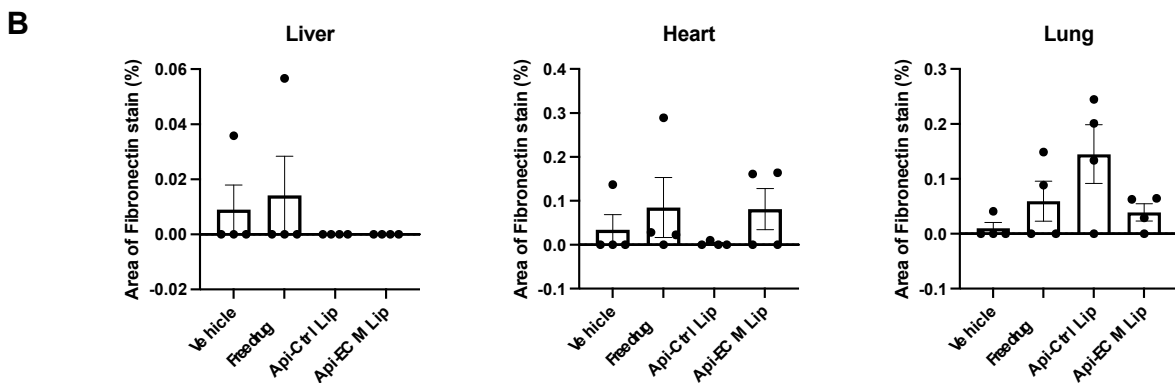

**Figure S7. Certificate of analysis of peptides synthesized by Tufts University. (A) MDLSLKPGGSK(FAM)C and (B) MNSIAIPGGSK(FAM)C.**

**A.**

**SynthAssist™**  
Peptide Synthesis

Report type: Sequence  
9/18/19 @ 3:17 PM  
File name: CP-RCM\_KELLY

Sequence editor: **MDLSLKP**  
Sequence: [H]-M-D-L-S-L-K-P-G-S-K-C-[NH2]  
Comments: CP-RCM  
K11+LYS 5/6-FAM  
Disulfide Bonds: 0  
Chemistry: Fmoc

Composition:  
Sequence: [H]-Met-Asp-Leu-Ser-Leu-Lys-Pro-Gly-Gly-Ser-Lys-Cys-[NH2]  
Composition: C48 H91 N15 O16 S2  
Weight: 1234.5060 + 554.4 = 1592.4  
C-Terminal: NH2  
N-Terminal: H  
# of Residues: 12  
AA List: AA Count  
Asp 1  
Cys 1  
Gly 2  
Leu 2  
Lys 2  
Met 1  
Pro 1  
Ser 2

Calculations:  
Sequence: [H]-Met-Asp(OtBu)-Leu-Ser(tBu)-Leu-Lys(Boc)-Pro-Gly-Gly-Ser(tBu)-Lys(Boc)-Cys(Trt)-[Amide Resin]  
Chemistry: Fmoc  
Resin Type: Amide Resin  
Resin Subst.: 0.612 mmol/g  
Resin moles: 0.100 mmol  
Resin Weight: 0.163 grams  
Blank Abs.: 0.000  
Sample Volume: 5.0 mL

| Cy | Amino Acid | Resin Eq. Wt. | Subst. mmol/g | R.S. mg | mmol  | Weight grams | A570 | Amine umol | Percent Coupling |
|----|------------|---------------|---------------|---------|-------|--------------|------|------------|------------------|
| 1  | Cys(Trt)   | 1979.45       | 0.505         | 0.000   | 0.100 | 0.198        |      |            |                  |

SynthAssist™ Software V1.0.0 Applied Biosystems, Inc © 1991 All Page 1 of 2

**SynthAssist™**  
Peptide Synthesis

Report type: Sequence  
9/18/19 @ 3:17 PM  
File name: CP-RCM\_KELLY

|    |           |         |       |       |       |       |  |  |  |
|----|-----------|---------|-------|-------|-------|-------|--|--|--|
| 2  | Lys(Boc)  | 2207.74 | 0.453 | 0.000 | 0.100 | 0.221 |  |  |  |
| 3  | Ser(tBu)  | 2350.93 | 0.425 | 0.000 | 0.100 | 0.235 |  |  |  |
| 4  | Gly       | 2407.98 | 0.415 | 0.000 | 0.100 | 0.241 |  |  |  |
| 5  | Gly       | 2465.04 | 0.406 | 0.000 | 0.100 | 0.247 |  |  |  |
| 6  | Pro       | 2562.15 | 0.390 | 0.000 | 0.100 | 0.256 |  |  |  |
| 7  | Lys(Boc)  | 2790.45 | 0.388 | 0.000 | 0.100 | 0.279 |  |  |  |
| 8  | Leu       | 2903.61 | 0.344 | 0.000 | 0.100 | 0.290 |  |  |  |
| 9  | Ser(tBu)  | 3046.79 | 0.328 | 0.000 | 0.100 | 0.305 |  |  |  |
| 10 | Leu       | 3159.95 | 0.316 | 0.000 | 0.100 | 0.316 |  |  |  |
| 11 | Asp(OtBu) | 3331.15 | 0.300 | 0.000 | 0.100 | 0.333 |  |  |  |
| 12 | Met       | 3462.35 | 0.289 | 0.000 | 0.100 | 0.346 |  |  |  |
| >  | H         | 3241.11 | 0.309 | 0.000 | 0.100 | 0.324 |  |  |  |

Total: 00.00

SynthAssist™ Software V1.0.0 Applied Biosystems, Inc © 1991 All Page 2 of 2

**B.**

**SynthAssist™**  
Peptide Synthesis

Report type: Sequence  
9/18/19 @ 3:15 PM  
File name: CP-ACT\_KELLY

Sequence editor: **MNSIAIP**  
Sequence: [H]-M-N-S-I-A-I-P-G-S-K-C-[NH2]  
Comments: CP-ACT  
K11+LYS 5/6-FAM  
Disulfide Bonds: 0  
Chemistry: Fmoc

Composition:  
Sequence: [H]-Met-Ans(Trt)-Ser(tBu)-Ile-Ala-Ile-Pro-Gly-Gly-Ser-Lys-Cys-[NH2]  
Composition: C48 H85 N15 O15 S2  
Weight: 1176.4256 + 354.4 = 1534.4  
C-Terminal: NH2  
N-Terminal: H  
# of Residues: 12  
AA List: AA Count  
Ala 1  
Ans 1  
Cys 1  
Gly 2  
Ile 2  
Lys 1  
Met 1  
Pro 1  
Ser 2

Calculations:  
Sequence: [H]-Met-Ans(Trt)-Ser(tBu)-Ile-Ala-Ile-Pro-Gly-Gly-Ser(tBu)-Lys(Boc)-Cys(Trt)-[Amide Resin]  
Chemistry: Fmoc  
Resin Type: Amide Resin  
Resin Subst.: 0.612 mmol/g  
Resin moles: 0.100 mmol  
Resin Weight: 0.163 grams  
Blank Abs.: 0.000  
Sample Volume: 5.0 mL

| Cy | Amino Acid | Resin Eq. Wt. | Subst. mmol/g | R.S. mg | mmol  | Weight grams | A570 | Amine umol | Percent Coupling |
|----|------------|---------------|---------------|---------|-------|--------------|------|------------|------------------|
| 1  | Cys(Trt)   | 1979.45       | 0.505         | 0.000   | 0.100 | 0.198        |      |            |                  |

SynthAssist™ Software V1.0.0 Applied Biosystems, Inc © 1991 All Page 1 of 2

**SynthAssist™**  
Peptide Synthesis

Report type: Sequence  
9/18/19 @ 3:15 PM  
File name: CP-ACT\_KELLY

|    |          |         |       |       |       |       |  |  |  |
|----|----------|---------|-------|-------|-------|-------|--|--|--|
| 1  | Cys(Trt) | 1979.45 | 0.505 | 0.000 | 0.100 | 0.198 |  |  |  |
| 2  | Lys(Boc) | 2207.74 | 0.453 | 0.000 | 0.100 | 0.221 |  |  |  |
| 3  | Ser(tBu) | 2350.93 | 0.425 | 0.000 | 0.100 | 0.235 |  |  |  |
| 4  | Gly      | 2407.98 | 0.415 | 0.000 | 0.100 | 0.241 |  |  |  |
| 5  | Gly      | 2465.04 | 0.406 | 0.000 | 0.100 | 0.247 |  |  |  |
| 6  | Pro      | 2562.15 | 0.390 | 0.000 | 0.100 | 0.256 |  |  |  |
| 7  | Ile      | 2675.31 | 0.374 | 0.000 | 0.100 | 0.268 |  |  |  |
| 8  | Ala      | 2746.39 | 0.364 | 0.000 | 0.100 | 0.275 |  |  |  |
| 9  | Ile      | 2859.55 | 0.350 | 0.000 | 0.100 | 0.286 |  |  |  |
| 10 | Ser(tBu) | 3003.74 | 0.333 | 0.000 | 0.100 | 0.300 |  |  |  |
| 11 | Ans(Trt) | 3359.17 | 0.298 | 0.000 | 0.100 | 0.326 |  |  |  |
| 12 | Met      | 3490.36 | 0.287 | 0.000 | 0.100 | 0.349 |  |  |  |
| >  | H        | 3269.13 | 0.306 | 0.000 | 0.100 | 0.327 |  |  |  |

Total: 00.00

SynthAssist™ Software V1.0.0 Applied Biosystems, Inc © 1991 All Page 2 of 2

**Table S1. Phage clone individual validation raw data and calculation.**

| Phage   | Mouse model | Organ    |             | Targeting Phage-VT680 |             |                                         |                                | M13Ke Phage-VT750   |             |                                         |                                | Radiant efficiency Targeting:M13Ke |
|---------|-------------|----------|-------------|-----------------------|-------------|-----------------------------------------|--------------------------------|---------------------|-------------|-----------------------------------------|--------------------------------|------------------------------------|
|         |             | Organ    | weight (mg) | # of phage injected   | # dye/phage | IVIS readouts: total radiant efficiency | Normalized radiant efficiency* | # of phage injected | # dye/phage | IVIS readouts: total radiant efficiency | Normalized radiant efficiency* |                                    |
| HPYSPLR | CP          | Liver    | 898.12      | 4.0E+11               | 144.97      | 8.81E+09                                | 1.69E-04                       | 4.0E+11             | 372.35      | 3.82E+10                                | 2.86E-04                       | 0.59                               |
|         |             | Pancreas | 391.21      | 4.0E+11               | 144.97      | 7.09E+09                                | 3.13E-04                       | 4.0E+11             | 372.35      | 2.84E+09                                | 4.87E-05                       | 6.42                               |
|         |             | Spleen   | 67.22       | 4.0E+11               | 144.97      | 3.75E+09                                | 9.61E-04                       | 4.0E+11             | 372.35      | 3.10E+09                                | 3.10E-04                       | 3.10                               |
|         | Healthy     | Liver    | 394.32      | 4.0E+11               | 140.20      | 1.48E+10                                | 6.71E-04                       | 4.0E+11             | 406.94      | 5.42E+10                                | 8.44E-04                       | 0.80                               |
|         |             | Pancreas | 52.36       | 4.0E+11               | 140.20      | 2.77E+09                                | 9.44E-04                       | 4.0E+11             | 406.94      | 1.94E+09                                | 2.27E-04                       | 4.16                               |
|         |             | Spleen   | 103.91      | 4.0E+11               | 140.20      | 3.92E+09                                | 6.73E-04                       | 4.0E+11             | 406.94      | 4.18E+09                                | 2.47E-04                       | 2.73                               |
| KTYVPTT | CP          | Liver    | 854.8       | 4.0E+11               | 167.47      | 1.11E+10                                | 1.93E-04                       | 4.0E+11             | 372.35      | 4.02E+10                                | 3.16E-04                       | 0.61                               |
|         |             | Pancreas | 218.97      | 4.0E+11               | 167.47      | 8.11E+09                                | 5.53E-04                       | 4.0E+11             | 372.35      | 1.51E+09                                | 4.64E-05                       | 11.90                              |
|         |             | Spleen   | 85.2        | 4.0E+11               | 167.47      | 3.58E+09                                | 6.28E-04                       | 4.0E+11             | 372.35      | 2.61E+09                                | 2.06E-04                       | 3.05                               |
|         | Healthy     | Liver    | 1067.16     | 4.0E+11               | 167.47      | 1.18E+10                                | 1.65E-04                       | 4.0E+11             | 381.14      | 5.10E+10                                | 3.13E-04                       | 0.53                               |
|         |             | Pancreas | 410.1       | 4.0E+11               | 167.47      | 3.65E+09                                | 1.33E-04                       | 4.0E+11             | 381.14      | 9.51E+08                                | 1.52E-05                       | 8.74                               |
|         |             | Spleen   | 98.27       | 4.0E+11               | 167.47      | 7.17E+09                                | 1.09E-03                       | 4.0E+11             | 381.14      | 4.76E+09                                | 3.18E-04                       | 3.43                               |
| MDLSLKP | CP          | Liver    | 780.82      | 4.0E+11               | 146.93      | 8.22E+09                                | 1.79E-04                       | 4.0E+11             | 372.35      | 2.91E+10                                | 2.50E-04                       | 0.72                               |
|         |             | Pancreas | 243.54      | 4.0E+11               | 146.93      | 5.85E+09                                | 4.09E-04                       | 4.0E+11             | 372.35      | 1.37E+09                                | 3.77E-05                       | 10.85                              |
|         |             | Spleen   | 80.31       | 4.0E+11               | 146.93      | 5.25E+09                                | 1.11E-03                       | 4.0E+11             | 372.35      | 4.92E+09                                | 4.11E-04                       | 2.70                               |
|         | Healthy     | Liver    | 1012.42     | 4.0E+11               | 146.93      | 8.59E+09                                | 1.44E-04                       | 4.0E+11             | 372.35      | 4.16E+10                                | 2.76E-04                       | 0.52                               |
|         |             | Pancreas | 264.06      | 4.0E+11               | 146.93      | 4.36E+09                                | 2.81E-04                       | 4.0E+11             | 372.35      | 1.91E+09                                | 4.85E-05                       | 5.79                               |
|         |             | Spleen   | 91.74       | 4.0E+11               | 146.93      | 3.35E+09                                | 6.22E-04                       | 4.0E+11             | 372.35      | 3.64E+09                                | 2.66E-04                       | 2.34                               |
| SLPLGPM | CP          | Liver    | 1006.12     | 4.0E+11               | 257.35      | 1.81E+10                                | 1.75E-04                       | 4.0E+11             | 372.35      | 4.12E+10                                | 2.75E-04                       | 0.64                               |
|         |             | Pancreas | 322.24      | 4.0E+11               | 257.35      | 7.93E+09                                | 2.39E-04                       | 4.0E+11             | 372.35      | 1.79E+09                                | 3.72E-05                       | 6.42                               |
|         |             | Spleen   | 90.42       | 4.0E+11               | 257.35      | 9.12E+09                                | 9.79E-04                       | 4.0E+11             | 372.35      | 3.78E+09                                | 2.81E-04                       | 3.49                               |
|         | Healthy     | Liver    | 980.82      | 4.0E+11               | 257.35      | 2.24E+10                                | 2.21E-04                       | 4.0E+11             | 381.14      | 4.79E+10                                | 3.20E-04                       | 0.69                               |
|         |             | Pancreas | 343.27      | 4.0E+11               | 257.35      | 3.83E+09                                | 1.08E-04                       | 4.0E+11             | 381.14      | 1.13E+09                                | 2.17E-05                       | 5.00                               |
|         |             | Spleen   | 95.61       | 4.0E+11               | 257.35      | 7.60E+09                                | 7.72E-04                       | 4.0E+11             | 381.14      | 3.92E+09                                | 2.69E-04                       | 2.87                               |
| HSGLNKQ | CP          | Liver    | 240.02      | 4.0E+11               | 141.41      | 8.85E+09                                | 6.51E-04                       | 4.0E+11             | 372.81      | 3.70E+10                                | 1.03E-03                       | 0.63                               |
|         |             | Pancreas | 40.94       | 4.0E+11               | 141.41      | 4.99E+09                                | 2.15E-03                       | 4.0E+11             | 372.81      | 2.17E+09                                | 3.55E-04                       | 6.07                               |
|         |             | Spleen   | 802.42      | 4.0E+11               | 141.41      | 4.69E+09                                | 1.03E-04                       | 4.0E+11             | 372.81      | 3.62E+09                                | 3.02E-05                       | 3.42                               |
|         | Healthy     | Liver    | 842.48      | 4.0E+11               | 106.78      | 6.03E+09                                | 1.68E-04                       | 4.0E+11             | 372.35      | 4.18E+10                                | 3.33E-04                       | 0.50                               |
|         |             | Pancreas | 239.5       | 4.0E+11               | 106.78      | 4.25E+09                                | 4.16E-04                       | 4.0E+11             | 372.35      | 1.49E+09                                | 4.19E-05                       | 9.93                               |
|         |             | Spleen   | 90.63       | 4.0E+11               | 106.78      | 3.45E+09                                | 8.92E-04                       | 4.0E+11             | 372.35      | 4.07E+09                                | 3.01E-04                       | 2.96                               |
| MNSIAIP | CP          | Liver    | 257.09      | 4.0E+11               | 115.32      | 9.36E+09                                | 7.89E-04                       | 4.0E+11             | 372.81      | 4.96E+10                                | 1.29E-03                       | 0.61                               |
|         |             | Pancreas | 45.9        | 4.0E+11               | 115.32      | 6.63E+09                                | 3.13E-03                       | 4.0E+11             | 372.81      | 2.19E+09                                | 3.19E-04                       | 9.81                               |
|         |             | Spleen   | 887.72      | 4.0E+11               | 115.32      | 2.27E+09                                | 5.54E-05                       | 4.0E+11             | 372.81      | 2.03E+09                                | 1.53E-05                       | 3.61                               |
|         | Healthy     | Liver    | 758.75      | 4.0E+11               | 151.45      | 8.22E+09                                | 1.79E-04                       | 4.0E+11             | 372.35      | 3.79E+10                                | 3.35E-04                       | 0.53                               |
|         |             | Pancreas | 309.56      | 4.0E+11               | 151.45      | 3.98E+09                                | 2.12E-04                       | 4.0E+11             | 372.35      | 1.94E+09                                | 4.20E-05                       | 5.04                               |
|         |             | Spleen   | 77.89       | 4.0E+11               | 151.45      | 3.93E+09                                | 8.34E-04                       | 4.0E+11             | 372.35      | 2.22E+09                                | 1.91E-04                       | 4.36                               |
| SANITNL | CP          | Liver    | 377.24      | 4.0E+11               | 136.80      | 1.31E+10                                | 6.35E-04                       | 4.0E+11             | 372.81      | 4.82E+10                                | 8.57E-04                       | 0.74                               |
|         |             | Pancreas | 35.65       | 4.0E+11               | 136.80      | 3.74E+09                                | 1.92E-03                       | 4.0E+11             | 372.81      | 2.54E+09                                | 4.77E-04                       | 4.02                               |
|         |             | Spleen   | 867.87      | 4.0E+11               | 136.80      | 5.11E+09                                | 1.08E-04                       | 4.0E+11             | 372.81      | 3.03E+09                                | 2.34E-05                       | 4.60                               |
|         | Healthy     | Liver    | 829.3       | 4.0E+11               | 87.24       | 6.56E+09                                | 2.27E-04                       | 4.0E+11             | 372.35      | 4.86E+10                                | 3.93E-04                       | 0.58                               |
|         |             | Pancreas | 375.21      | 4.0E+11               | 87.24       | 3.27E+09                                | 2.50E-04                       | 4.0E+11             | 372.35      | 3.27E+09                                | 5.85E-05                       | 4.27                               |
|         |             | Spleen   | 87.12       | 4.0E+11               | 87.24       | 2.61E+09                                | 8.59E-04                       | 4.0E+11             | 372.35      | 3.68E+09                                | 2.83E-04                       | 3.03                               |
| SLTNSSF | CP          | Liver    | 961.08      | 2.5E+11               | 182.53      | 1.82E+10                                | 4.43E-04                       | 2.5E+11             | 381.14      | 3.01E+10                                | 3.34E-04                       | 1.33                               |
|         |             | Pancreas | 217.65      | 2.5E+11               | 182.53      | 1.35E+09                                | 1.45E-04                       | 2.5E+11             | 381.14      | 3.33E+08                                | 1.63E-05                       | 8.86                               |
|         |             | Spleen   | 93.18       | 2.5E+11               | 182.53      | 1.11E+09                                | 2.78E-04                       | 2.5E+11             | 381.14      | 9.19E+08                                | 1.05E-04                       | 2.65                               |
|         | Healthy     | Liver    | 810.23      | 4.0E+11               | 447.23      | 9.27E+09                                | 6.39E-05                       | 4.0E+11             | 372.35      | 7.25E+09                                | 6.01E-05                       | 1.06                               |
|         |             | Pancreas | 314.3       | 4.0E+11               | 447.23      | 7.86E+09                                | 1.40E-04                       | 4.0E+11             | 372.35      | 4.04E+09                                | 8.63E-05                       | 1.62                               |
|         |             | Spleen   | 108.22      | 4.0E+11               | 447.23      | 7.59E+09                                | 3.92E-04                       | 4.0E+11             | 372.35      | 2.35E+09                                | 1.46E-04                       | 2.69                               |
| SNSQDLH | CP          | Liver    | 302.49      | 4.0E+11               | 167.62      | 1.31E+10                                | 6.45E-04                       | 4.0E+11             | 372.81      | 3.98E+10                                | 8.82E-04                       | 0.73                               |
|         |             | Pancreas | 28.81       | 4.0E+11               | 167.62      | 4.05E+09                                | 2.10E-03                       | 4.0E+11             | 372.81      | 1.45E+09                                | 3.37E-04                       | 6.22                               |
|         |             | Spleen   | 962.65      | 4.0E+11               | 167.62      | 7.33E+09                                | 1.13E-04                       | 4.0E+11             | 372.81      | 4.98E+09                                | 3.47E-05                       | 3.27                               |
|         | Healthy     | Liver    | 820.63      | 4.0E+11               | 142.64      | 8.55E+09                                | 1.82E-04                       | 4.0E+11             | 372.35      | 4.35E+10                                | 3.56E-04                       | 0.51                               |
|         |             | Pancreas | 336.62      | 4.0E+11               | 142.64      | 1.43E+09                                | 7.43E-05                       | 4.0E+11             | 372.35      | 1.80E+09                                | 3.59E-05                       | 2.07                               |
|         |             | Spleen   | 70.03       | 4.0E+11               | 142.64      | 2.80E+09                                | 7.00E-04                       | 4.0E+11             | 372.35      | 2.35E+09                                | 2.25E-04                       | 3.11                               |

\*Normalized radiant efficiency = total radiant efficiency/(# of phage injected × # of dye/phage × tissue weight in gram)



**Table S1. Phage clone individual validation raw data and calculation (continued).**

**CP-to-healthy ratio = normalized radiant efficiency of CP / normalized radiant efficiency of healthy tissue**

| Phage   | CP-to-healthy Ratio |          |        |
|---------|---------------------|----------|--------|
|         | Liver               | Pancreas | Spleen |
| HPYSPLR | 0.744               | 1.544    | 1.138  |
| KTYVPTT | 1.161               | 1.362    | 0.890  |
| MDLSLKP | 1.370               | 1.875    | 1.156  |
| SLPLGPM | 0.921               | 1.286    | 1.215  |
| HSGLNKQ | 1.254               | 0.611    | 1.157  |
| MNSIAIP | 1.144               | 1.945    | 0.829  |
| SANITNL | 1.287               | 0.943    | 1.518  |
| SLTNSSF | 1.248               | 5.469    | 0.985  |
| SNSQDLH | 1.428               | 3.009    | 0.165  |

**Table S2. P-values of statistical tests performed on Manders' correlation coefficients of phage clones overlapping with cell markers.** One-way ANOVA and Tukey-Kramer method were used for all tests. The result was considered significant if the p-value  $\leq 0.05$ . ns: not statistically significant.

| Figure    | Phage clone | MCC Comparison           | Adjusted P-value | Summary |
|-----------|-------------|--------------------------|------------------|---------|
| Figure 3B | MDLSLKP     | Col IIIa vs $\alpha$ SMA | <0.0001          | ****    |
| Figure 3B |             | Col IIIa vs CD31         | <0.0001          | ****    |
| Figure 3B |             | Col IIIa vs CK7          | <0.0001          | ****    |
| Figure 3B |             | Col IIIa vs CPA-1        | <0.0001          | ****    |
| Figure 3B |             | Col IIIa vs F4/80        | <0.0001          | ****    |
| Figure 3B | SLPLGPM     | F4/80 vs $\alpha$ SMA    | 0.0023           | **      |
| Figure 3B |             | F4/80 vs CD31            | 0.0448           | *       |
| Figure 3B |             | F4/80 vs CK7             | <0.0001          | ****    |
| Figure 3B |             | F4/80 vs Col IIIa        | 0.0284           | *       |
| Figure 3B |             | F4/80 vs CPA-1           | 0.4832           | ns      |
| Figure 3B | HPYSPLR     | F4/80 vs $\alpha$ SMA    | <0.0001          | ****    |
| Figure 3B |             | F4/80 vs CD31            | 0.8189           | ns      |
| Figure 3B |             | F4/80 vs CK7             | <0.0001          | ****    |
| Figure 3B |             | F4/80 vs Col IIIa        | 0.082            | ns      |
| Figure 3B |             | F4/80 vs CPA-1           | 0.0342           | *       |
| Figure 3B | KTYVPTT     | $\alpha$ SMA vs CD31     | <0.0001          | ****    |
| Figure 3B |             | $\alpha$ SMA vs CK7      | <0.0001          | ****    |
| Figure 3B |             | $\alpha$ SMA vs Col IIIa | 0.0003           | ***     |
| Figure 3B |             | $\alpha$ SMA vs CPA-1    | 0.0006           | ***     |
| Figure 3B |             | $\alpha$ SMA vs F4/80    | 0.0095           | **      |
| Figure 3B | SLTNSSF     | F4/80 vs $\alpha$ SMA    | <0.0001          | ****    |
| Figure 3B |             | F4/80 vs CD31            | <0.0001          | ****    |
| Figure 3B |             | F4/80 vs CK7             | <0.0001          | ****    |
| Figure 3B |             | F4/80 vs Col IIIa        | <0.0001          | ****    |
| Figure 3B |             | F4/80 vs CPA-1           | <0.0001          | ****    |
| Figure 3B | MNSIAIP     | CPA-1 vs $\alpha$ SMA    | <0.0001          | ****    |
| Figure 3B |             | CPA-1 vs CD31            | <0.0001          | ****    |
| Figure 3B |             | CPA-1 vs CK7             | <0.0001          | ****    |
| Figure 3B |             | CPA-1 vs Col IIIa        | <0.0001          | ****    |
| Figure 3B |             | CPA-1 vs F4/80           | 0.0002           | ***     |
| Figure 3B | SNSQDLH     | F4/80 vs $\alpha$ SMA    | <0.0001          | ****    |
| Figure 3B |             | F4/80 vs CD31            | <0.0001          | ****    |
| Figure 3B |             | F4/80 vs CK7             | <0.0001          | ****    |
| Figure 3B |             | F4/80 vs Col IIIa        | <0.0001          | ****    |
| Figure 3B |             | F4/80 vs CPA-1           | <0.0001          | ****    |

**Table S3. P-values of statistical tests performed on Manders' correlation coefficients of liposomes overlapping with cell markers.** One-way ANOVA and Tukey-Kramer method were used for all tests. The result was considered significant if the p-value  $\leq 0.05$ . ns: not statistically significant.

| Figure    | Liposome    | MCC Comparison           | Adjusted P-value | Summary |
|-----------|-------------|--------------------------|------------------|---------|
| Figure 5B | MDLSLKP     | Col IIIa vs $\alpha$ SMA | <0.0001          | ****    |
| Figure 5B |             | Col IIIa vs CD31         | <0.0001          | ****    |
| Figure 5B |             | Col IIIa vs CK7          | <0.0001          | ****    |
| Figure 5B |             | Col IIIa vs CPA-1        | <0.0001          | ****    |
| Figure 5B |             | Col IIIa vs F4/80        | 0.0012           | **      |
| Figure 5B | MNSIAIP     | CPA-1 vs $\alpha$ SMA    | 0.0005           | ***     |
| Figure 5B |             | CPA-1 vs CD31            | 0.3179           | ns      |
| Figure 5B |             | CPA-1 vs CK7             | 0.0013           | **      |
| Figure 5B |             | CPA-1 vs Col IIIa        | 0.9882           | ns      |
| Figure 5B |             | CPA-1 vs F4/80           | 0.9746           | ns      |
| Figure 5B | NC Liposome | F4/80 vs $\alpha$ SMA    | <0.0001          | ****    |
| Figure 5B |             | F4/80 vs CD31            | <0.0001          | ****    |
| Figure 5B |             | F4/80 vs CK7             | <0.0001          | ****    |
| Figure 5B |             | F4/80 vs Col IIIa        | <0.0001          | ****    |
| Figure 5B |             | F4/80 vs CPA-1           | <0.0001          | ****    |
